# Supplementary material for: A ready-to-use deep eutectic solvent-immersed polypropylene fabric cap microextraction strategy for nonsteroidal anti-inflammatory drugs analysis in plasma: a proof-of-concept study
Source: Royal Society of Chemistry journal article supplement (doi:10.1039/d6ra02568d), 2026-06-01
Supplement: d6ra02568d1.pdf [file d6ra02568d1.pdf]

**Fig. S1.** Effect of NaCl concentration (0–5%, w/v) on the extraction recoveries of the six NSAIDs.

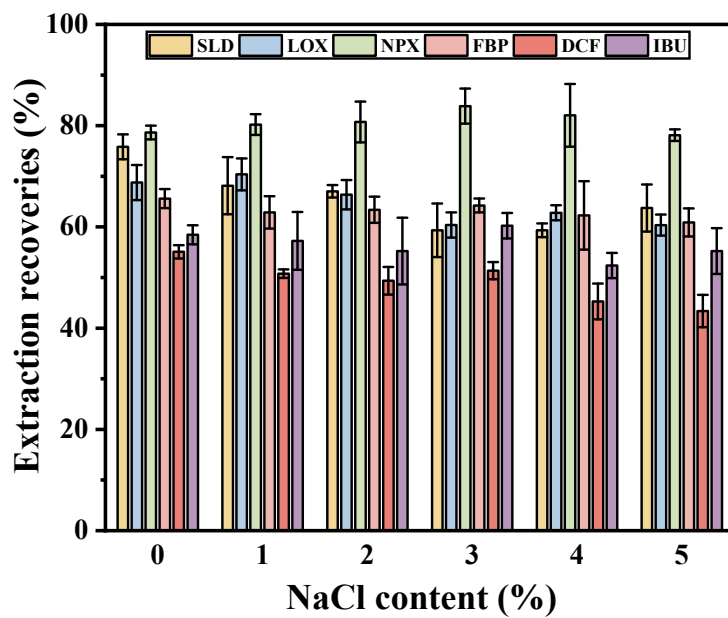

**Fig. S2.** SEM images of polypropylene fabrics with varying nominal pore sizes (500×):  
(A) 25  $\mu\text{m}$ , (B) 50  $\mu\text{m}$ , (C) 100  $\mu\text{m}$ , (D) 150  $\mu\text{m}$ , and (E) 300  $\mu\text{m}$ .

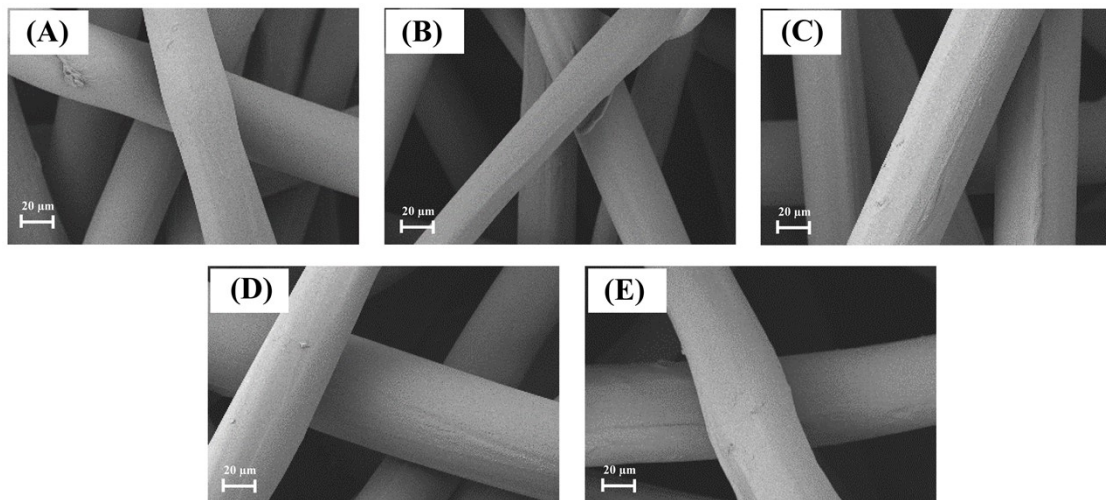

**Fig. S3.** Stability of the DES-PPF-CME device evaluated by the extraction recoveries of six NSAIDs after storage for up to 3 months.

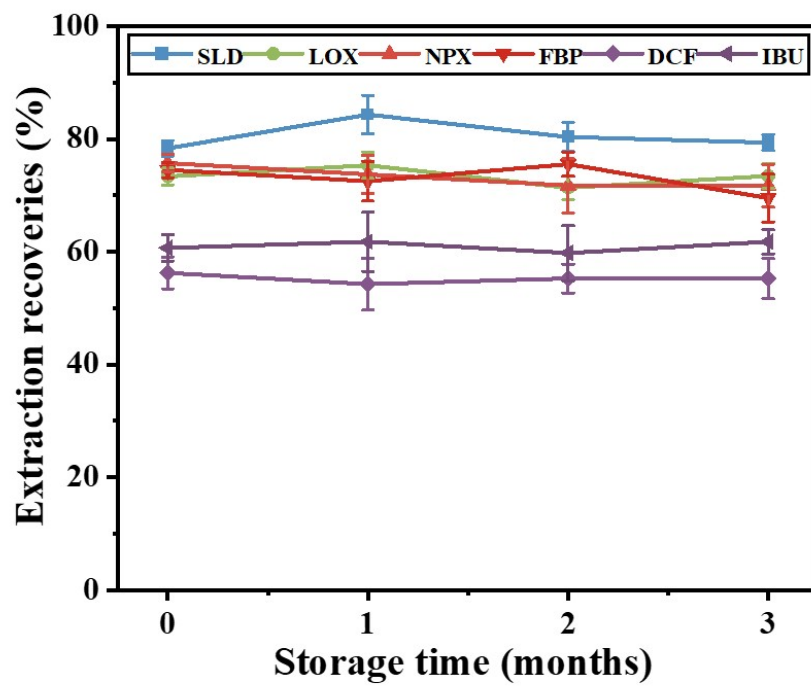

**Fig. S4.** Visualization of DES stability on the polypropylene fabric (PPF) cap before and after extraction: (A) before extraction, and (B) after extraction. The DES was pre-stained with Oil Red O to visualize whether it detached from the polypropylene fabric during the shaking process.

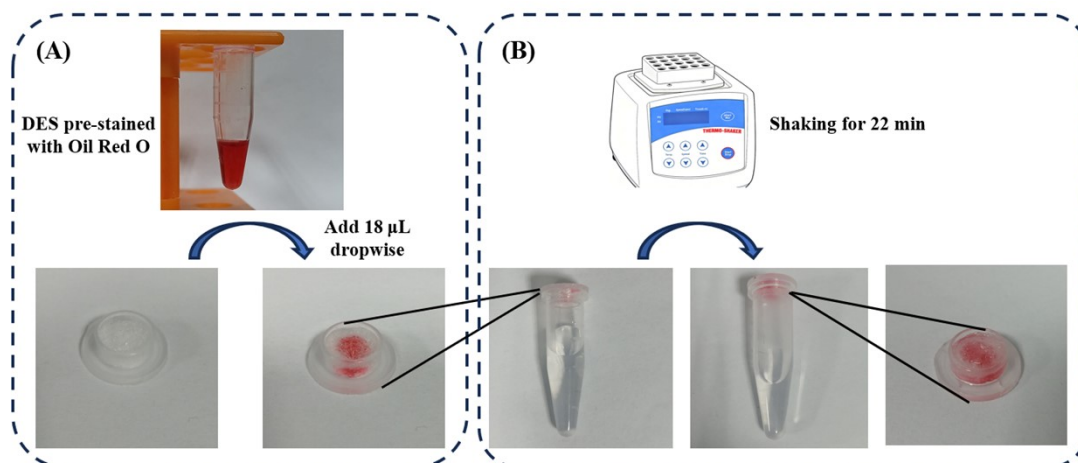

**Fig. S5.** Evaluation of batch-to-batch reproducibility of the DES-PPF-CME device using five independently fabricated batches.

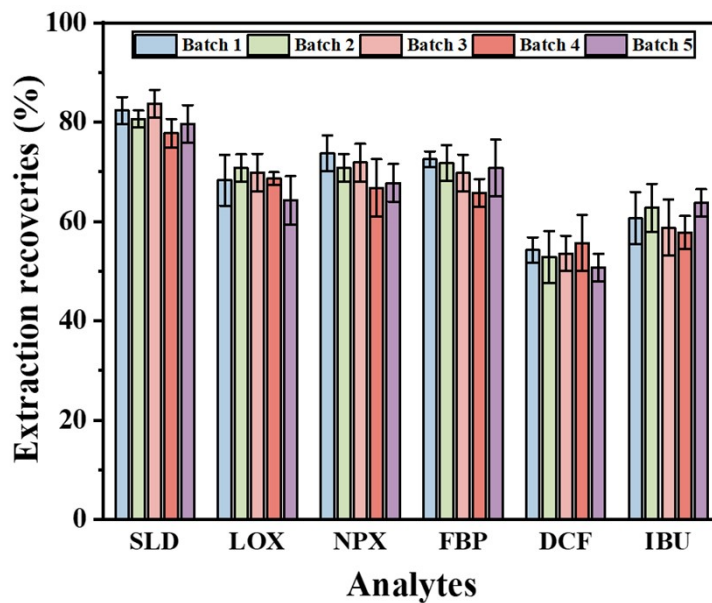

**Fig. S6.** The relative recoveries for all analytes across the six individual sources. (500 ng/mL)

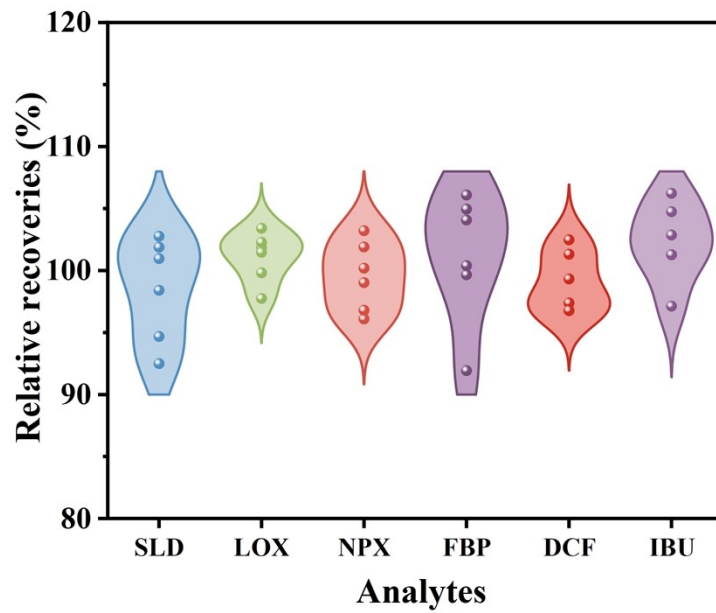

**Table S1.** Chemical information of target analytes.

| Name              | Abbreviation | Structure                                                                            | CAS number |
|-------------------|--------------|--------------------------------------------------------------------------------------|------------|
| Sulindac          | SLD          | 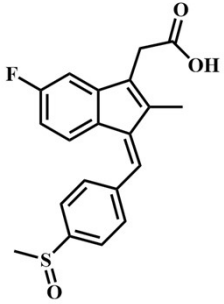   | 38194-50-2 |
| Loxoprofen        | LOX          |    | 68767-14-6 |
| Naproxen          | NPX          |   | 22204-53-1 |
| Flurbiprofen      | FBP          |  | 5104-49-4  |
| Diclofenac sodium | DCF          |  | 15307-79-6 |
| Ibuprofen         | IBU          |  | 15687-27-1 |

Reference data source: <https://www.chemicalbook.com/>

**Table S2.** Independent variables and their levels used in the BBD.

| Factor                       | Level     |              |            |
|------------------------------|-----------|--------------|------------|
|                              | Low level | Medium level | High level |
| DES volume ( $\mu\text{L}$ ) | 10        | 20           | 30         |
| Sample solution pH           | 3.5       | 5.5          | 7.5        |
| Extraction time (min)        | 10        | 20           | 30         |

**Table S3.** BBD matrix and observed response values for the RSM optimization of NSAIDs extraction.

| Number | DES volume<br>( $\mu\text{L}$ ) | Sample<br>solution pH | Extraction<br>time (min) | Extraction<br>recovery (%) |
|--------|---------------------------------|-----------------------|--------------------------|----------------------------|
| 1      | 20                              | 5.5                   | 20                       | 72.4                       |
| 2      | 20                              | 3.5                   | 30                       | 64.0                       |
| 3      | 20                              | 7.5                   | 10                       | 47.7                       |
| 4      | 30                              | 3.5                   | 20                       | 62.8                       |
| 5      | 10                              | 5.5                   | 10                       | 48.5                       |
| 6      | 20                              | 7.5                   | 30                       | 58.0                       |
| 7      | 20                              | 5.5                   | 20                       | 72.4                       |
| 8      | 10                              | 7.5                   | 20                       | 42.1                       |
| 9      | 10                              | 5.5                   | 30                       | 61.4                       |
| 10     | 20                              | 5.5                   | 20                       | 73.0                       |
| 11     | 20                              | 3.5                   | 10                       | 55.6                       |
| 12     | 20                              | 5.5                   | 20                       | 72.8                       |
| 13     | 30                              | 7.5                   | 20                       | 58.4                       |
| 14     | 20                              | 5.5                   | 20                       | 73.0                       |
| 15     | 10                              | 3.5                   | 20                       | 57.1                       |
| 16     | 30                              | 5.5                   | 10                       | 59.0                       |
| 17     | 30                              | 5.5                   | 30                       | 74.0                       |

**Table S4.** Analysis of variance (ANOVA) for the quadratic response surface model.

| Source                             | Sum of squares | DF | Mean square | F Value | P Value |             |
|------------------------------------|----------------|----|-------------|---------|---------|-------------|
| Model                              | 1604.06        | 9  | 178.23      | 87.63   | <0.0001 | significant |
| A- DES<br>volume ( $\mu\text{L}$ ) | 255.38         | 1  | 255.38      | 125.56  | <0.0001 |             |
| B- Sample<br>solution pH           | 132.85         | 1  | 132.85      | 65.31   | <0.0001 |             |
| C- Extraction<br>time (min)        | 278.48         | 1  | 278.48      | 136.91  | <0.0001 |             |
| AB                                 | 27.56          | 1  | 27.56       | 13.55   | 0.0078  |             |
| AC                                 | 1.10           | 1  | 1.10        | 0.54    | 0.4855  |             |
| BC                                 | 0.42           | 1  | 0.42        | 0.21    | 0.6624  |             |
| A <sup>2</sup>                     | 180.50         | 1  | 180.50      | 88.74   | <0.0001 |             |
| B <sup>2</sup>                     | 518.55         | 1  | 518.55      | 254.94  | <0.0001 |             |
| C <sup>2</sup>                     | 124.95         | 1  | 124.95      | 61.43   | 0.0001  |             |
| Residual                           | 14.24          | 7  | 2.03        |         |         |             |
| Lack of fit                        | 13.87          | 3  | 4.62        | 50.25   | 0.0012  | significant |
| Pure error                         | 0.37           | 4  | 0.09        |         |         |             |
| Cor total                          | 1618.30        | 16 |             |         |         |             |

**Table S5.** Intra-day and inter-day relative recoveries and RSDs of the validated method at three different concentration spiking levels.

| Analyte | Added<br>(ng/mL) | Intra-day (n=3) |          | Inter-day (n=3) |          |
|---------|------------------|-----------------|----------|-----------------|----------|
|         |                  | Recovery (%)    | RSDs (%) | Recovery (%)    | RSDs (%) |
| SLD     | 100              | 101.5           | 1.8      | 87.3            | 6.5      |
|         | 300              | 101.9           | 5.0      | 102.1           | 7.2      |
|         | 500              | 107.3           | 0.9      | 96.2            | 6.6      |
| LOX     | 100              | 99.1            | 7.1      | 93.6            | 8.6      |
|         | 300              | 104.0           | 1.9      | 97.9            | 6.9      |
|         | 500              | 101.0           | 2.9      | 92.6            | 7.5      |
| NPX     | 20               | 103.8           | 2.8      | 108.4           | 1.6      |
|         | 100              | 102.8           | 2.0      | 102.1           | 2.5      |
|         | 500              | 99.6            | 0.4      | 92.5            | 6.9      |
| FBP     | 50               | 91.0            | 5.5      | 88.6            | 6.3      |
|         | 200              | 104.0           | 2.8      | 90.5            | 5.5      |
|         | 500              | 99.6            | 1.1      | 94.4            | 5.2      |
| DCF     | 100              | 109.8           | 2.6      | 95.8            | 8.1      |
|         | 300              | 102.8           | 2.6      | 104.4           | 1.4      |
|         | 500              | 103.3           | 1.6      | 98.7            | 6.1      |
| IBU     | 100              | 108.1           | 5.0      | 97.8            | 8.2      |
|         | 300              | 106.7           | 4.5      | 104.4           | 7.3      |
|         | 500              | 105.7           | 4.8      | 94.1            | 8.0      |

**Table S6.** Spike recoveries and precision (RSDs) of NSAIDs in plasma samples obtained by spiking known amounts of analytes into blank plasma.

| Analyte | Added (ng/mL) | Spike recovery (%) | RSDs (%) |
|---------|---------------|--------------------|----------|
|         | 0             | 0.0                | 0.0      |
| SLD     | 200           | 103.0              | 2.3      |
|         | 500           | 100.6              | 2.2      |
|         | 0             | 0.0                | 0.0      |
| LOX     | 200           | 96.1               | 5.2      |
|         | 500           | 95.2               | 1.1      |
|         | 0             | 0.0                | 0.0      |
| NPX     | 100           | 88.8               | 4.3      |
|         | 500           | 97.6               | 4.2      |
|         | 0             | 0.0                | 0.0      |
| FBP     | 200           | 105.8              | 3.1      |
|         | 500           | 99.6               | 2.3      |
|         | 0             | 0.0                | 0.0      |
| DCF     | 200           | 101.1              | 1.7      |
|         | 500           | 103.2              | 3.8      |
|         | 0             | 0.0                | 0.0      |
| IBU     | 200           | 95.9               | 2.2      |
|         | 500           | 92.5               | 4.4      |

Spike recovery (%) was calculated as (measured concentration / spiked concentration) × 100%.

**Table S7.** Comparison of the proposed method with representative previously reported methods for the determination of NSAIDs (a: Loxoprofen; b: Naproxen; c: Flurbiprofen; d: Diclofenac sodium; e: Ibuprofen; f: Sulindac).

| Sample matrix             | Extraction sorbent/solvent             | Extraction technique | Extraction time (min) | Extraction operation/ready-to-use        | Detection technique | Relative recovery (%) | LODs (ng/mL)              | Greenness assessment (AGREE)                                                          | Reference |
|---------------------------|----------------------------------------|----------------------|-----------------------|------------------------------------------|---------------------|-----------------------|---------------------------|---------------------------------------------------------------------------------------|-----------|
| Wastewater, plasma        | 1,2-Dichloroethane                     | AALLME               | 68                    | Air-agitation, vortex and centrifugation | HPLC-DAD            | 93.0–106.0%           | 0.3–0.9 <sup>e</sup>      |    | [1]       |
| Simulated aqueous samples | Nitrogen-doped graphene quantum dots   | SPE                  | 60.0                  | Vortex and centrifugation/No             | UPLC-UV             | 95.0–98.7%            | 15.7–23.6 <sup>d, e</sup> |   | [2]       |
| Urine, plasma             | NADES (Fatty acids, etc), hollow fiber | NADES- HF-LPME-EME   | 20.0                  | Stirring/No                              | HPLC-UV             | 88.3–104.4%           | 8 <sup>e</sup>            |  | [3]       |

|                              |                                                   |             |      |                              |         |             |                                      |                                                                                     |           |
|------------------------------|---------------------------------------------------|-------------|------|------------------------------|---------|-------------|--------------------------------------|-------------------------------------------------------------------------------------|-----------|
| Environmental water and milk | DES ([TMGH]Cl, thymol)                            | UA-DLLME    | 25.0 | Vortex and centrifugation/No | HPLC-UV | 79.4–107.5% | 0.5–1.0 <sup>e</sup>                 |  | [4]       |
| Urine                        | Copper nanoparticles coated polyester fabric      | PF-SPE      | >20  | Vortex/Yes                   | HPLC-UV | 94.0–110.0% | 0.3–1.0 <sup>d, e</sup>              |  | [5]       |
| Plasma                       | DES (MTOAB, decanoic acid), Polypropylene fabrics | DES-PPF-CME | 22   | Vortex/Yes                   | HPLC-UV | 87.3–108.4% | 1.1–19.7 <sup>a, b, c, d, e, f</sup> |  | This work |

AALLME: air-agitated liquid-liquid microextraction; MF-LPME: Microfluidic-based liquid-phase microextraction; SPE: Solid-phase extraction; NADES-HF-LPME-EME: Natural deep eutectic solvent-based hollow fiber electro-membrane extraction; UA-DLLME: Ultrasound-assisted dispersive liquid-liquid microextraction; PF-SPE: Polyester fabric-based solid-phase extraction.

## References

- [1] M. Bazregar, M. Rajabi, Y. Yamini, A. Asghari, M. Hemmati, Tandem air-agitated liquid-liquid microextraction as an efficient method for determination of acidic drugs in complicated matrices, *Anal. Chim. Acta* 917 (2016) 44-52. <https://doi.org/10.1016/j.aca.2016.03.005>
- [2] A. Alhendal, Silane modified nitrogen-doped graphene quantum dots as a high-efficiency hybrid sorbent for NSAIDs, *RSC Adv.* 15(12) (2025) 9364-9374. <https://doi.org/10.1039/d5ra00253b>
- [3] M. Beiranvand, Y. Yamini, M.M. Khataei, Eco-friendly and efficient electro-membrane extraction coupled with HPLC for simultaneous determination of nonsteroidal anti-inflammatory drugs in biological samples, *Anal. Chim. Acta* 1376 (2025) 344639. <https://doi.org/10.1016/j.aca.2025.344639>
- [4] L. Qiao, R. Sun, C. Yu, Y. Tao, Y. Yan, Novel hydrophobic deep eutectic solvents for ultrasound-assisted dispersive liquid-liquid microextraction of trace non-steroidal anti-inflammatory drugs in water and milk samples, *Microchemical J.* 170 (2021) 106686. <https://doi.org/10.1016/j.microc.2021.106686>
- [5] N. Moradi, G. Soufi, A. Kabir, M. Karimi, H. Bagheri, Polyester fabric-based nano copper-polyhedral oligomeric silsesquioxanes sorbent for thin film extraction of non-steroidal anti-inflammatory drugs, *Anal. Chim. Acta* 1270 (2023) 341461. <https://doi.org/10.1016/j.aca.2023.341461>
